# Supplementary material for: Differentiating between infectious and non-infectious influenza A virus and coronavirus RNA levels using long-range RT-qPCR
Source: bioRxiv or medRxiv preprint supplement (doi:10.1101/2021.11.11.21266219), 2022-03-14
Supplement: Supplementary file [file media-1.pdf]

## Supplemental information

Charlotte V. Rigby<sup>1,2,3,\$</sup>, Dovile Juozapaite<sup>4,\$</sup>, Ingrida Olendraite<sup>1,4</sup>, Pankaj Mathur<sup>5</sup>, Kalyan Dhanorkar<sup>5</sup>, Vishalraj Hulle<sup>5</sup>, Tejas Shah<sup>6</sup>, Vijeta Jadhao<sup>6</sup>, Shravan Mutha<sup>6</sup>, Hamid Jalal<sup>3</sup>, Vikram Gopal<sup>5\*</sup>, Aartjan J.W. te Velthuis<sup>1,2,\*</sup>

<sup>1</sup> Lewis Thomas Laboratory, Department of Molecular Biology, University of Princeton, Princeton, 08540 NJ, United States.

<sup>2</sup> University of Cambridge, Department of Pathology, Addenbrooke's Hospital, Cambridge CB2 2QQ, United Kingdom.

<sup>3</sup> Public Health England, Addenbrooke's Hospital, Cambridge CB2 2QQ, United Kingdom.

<sup>4</sup> Vilnius University Hospital Santaros Klinikos, Hematology, Oncology and Transfusion Medicine Center, Santariskiu st. 2, 08661 Vilnius, Lithuania

<sup>5</sup> Pune Instrumentation Pvt. Ltd., PCNTDA, Bhosari, Pune, 411026, India.

<sup>6</sup> Krsnaa Diagnostics Ltd, Chinchwad, Pune, 411033, India

\* Address correspondence to: [VGopal@umich.edu](mailto:VGopal@umich.edu); [aj.te.velthuis@princeton.edu](mailto:aj.te.velthuis@princeton.edu);

<sup>\$</sup>contributed equally

**Table S1.** Clinical Ct values of samples used for Fig. 4A.

| <b>CoviPath 1-step multiplex kit</b> |               |           |
|--------------------------------------|---------------|-----------|
| <b>Sample ID</b>                     | <b>Target</b> | <b>Ct</b> |
| 1                                    | N             | 17.7      |
|                                      | ORF1ab        | 16.91     |
| 2                                    | N             | 19.27     |
|                                      | ORF1ab        | 19.27     |
| 3                                    | N             | 14.97     |
|                                      | ORF1ab        | 14.11     |
| 4                                    | N             | 13.74     |
|                                      | ORF1ab        | 13.17     |
| 5                                    | N             | 13.55     |
|                                      | ORF1ab        | 14.72     |
| 6                                    | N             | 18.16     |
|                                      | ORF1ab        | 18.98     |
| 7                                    | N             | 19.01     |
|                                      | ORF1ab        | 18.85     |
| 8                                    | N             | 16.25     |
|                                      | ORF1ab        | 16.66     |
| 9                                    | N             | 16.39     |
|                                      | ORF1ab        | 17.41     |
| 10                                   | N             | 21.14     |
|                                      | ORF1ab        | 21.37     |

**Table S2.** Ct values of samples takes <5 days after onset of symptoms. Samples 3-6 were excluded from Fig. 1 and statistical analysis because of mismatched probes.

| Sample ID | oligodT <sub>20</sub> primer |      | Random hexamers    |      |
|-----------|------------------------------|------|--------------------|------|
|           | Target (probe)               | Ct   | Target (probe)     | Ct   |
| 1         | N (TaqPath)                  | 19.3 | N (TaqPath)        | 15.2 |
|           | ORF1ab (TaqPath)             | 20.3 | ORF1ab (TaqPath)   | 16.0 |
| 2         | N (TaqPath)                  | 24.7 | N (TaqPath)        | 23.3 |
|           | ORF1ab (TaqPath)             | 26.0 | ORF1ab (TaqPath)   | 22.0 |
| 3         | N (TaqPath)                  | 22.8 | N (LifeRiver)      | 20.8 |
|           | ORF1ab (TaqPath)             | 23.7 | ORF1ab (LifeRiver) | 20.9 |
| 4         | N (TaqPath)                  | 14.9 | N (GeneXpert)      | 14.8 |
|           | ORF1ab (TaqPath)             | 15.9 | E (GeneXpert)      | 12.4 |
| 5         | N (TaqPath)                  | 25.3 | N (GeneXpert)      | 24.5 |
|           | ORF1ab (TaqPath)             | 25.9 | E (GeneXpert)      | 22.6 |
| 6         | N (TaqPath)                  | 24.6 | N (GeneXpert)      | 23.9 |
|           | ORF1ab (TaqPath)             | 25.9 | E (GeneXpert)      | 22.1 |
| 7         | N (TaqPath)                  | 20.3 | N (TaqPath)        | 18.3 |
|           | ORF1ab (TaqPath)             | 22.0 | ORF1ab (TaqPath)   | 17.4 |
| 8         | N (TaqPath)                  | 21.3 | N (TaqPath)        | 20.3 |
|           | ORF1ab (TaqPath)             | 22.8 | ORF1ab (TaqPath)   | 21.6 |
| 9         | N (TaqPath)                  | 15.9 | N (TaqPath)        | 18.1 |
|           | ORF1ab (TaqPath)             | 16.9 | ORF1ab (TaqPath)   | 16.6 |
| 10        | N (TaqPath)                  | 24.6 | N (TaqPath)        | 19.1 |
|           | ORF1ab (TaqPath)             | 25.6 | ORF1ab (TaqPath)   | 18.8 |

**Table S3.** Ct values of samples takes >15 days after onset of symptoms. Undetectable levels are indicated with U.D.

| Sample ID | oligodT <sub>20</sub> primer |      | Random hexamers  |      |
|-----------|------------------------------|------|------------------|------|
|           | Target (probe)               | Ct   | Target (probe)   | Ct   |
| 1         | N (TaqPath)                  | UD   | N (TaqPath)      | 33.0 |
|           | ORF1ab (TaqPath)             | UD   | ORF1ab (TaqPath) | 32.5 |
| 2         | N (TaqPath)                  | UD   | N (TaqPath)      | 32.8 |
|           | ORF1ab (TaqPath)             | UD   | ORF1ab (TaqPath) | 33.8 |
| 3         | N (TaqPath)                  | 37.7 | N (TaqPath)      | 31.7 |
|           | ORF1ab (TaqPath)             | UD   | ORF1ab (TaqPath) | 33.3 |
| 4         | N (TaqPath)                  | 30.0 | N (TaqPath)      | 32.1 |
|           | ORF1ab (TaqPath)             | 31.3 | ORF1ab (TaqPath) | 33.1 |
| 5         | N (TaqPath)                  | 34.2 | N (TaqPath)      | 32.3 |
|           | ORF1ab (TaqPath)             | 37.8 | ORF1ab (TaqPath) | 32.1 |
| 6         | N (TaqPath)                  | UD   | N (TaqPath)      | 31.3 |
|           | ORF1ab (TaqPath)             | UD   | ORF1ab (TaqPath) | 31.7 |
| 7         | N (TaqPath)                  | UD   | N (TaqPath)      | 37.8 |
|           | ORF1ab (TaqPath)             | UD   | ORF1ab (TaqPath) | 37.3 |
| 8         | N (TaqPath)                  | UD   | N (TaqPath)      | 36.2 |
|           | ORF1ab (TaqPath)             | UD   | ORF1ab (TaqPath) | 34.9 |
| 9         | N (TaqPath)                  | UD   | N (TaqPath)      | 34.0 |
|           | ORF1ab (TaqPath)             | UD   | ORF1ab (TaqPath) | UD   |
| 10        | N (TaqPath)                  | UD   | N (TaqPath)      | 33.1 |
|           | ORF1ab (TaqPath)             | UD   | ORF1ab (TaqPath) | 34.2 |
